# Supplementary material for: Chemical Profile, Antioxidant, Anti-Proliferative, Anticoagulant and Mutagenic Effects of a Hydroalcoholic Extract of Tuscan Rosmarinus officinalis
Source: MDPI journal article supplement (doi:10.3390/plants10010097), 2021-01-06

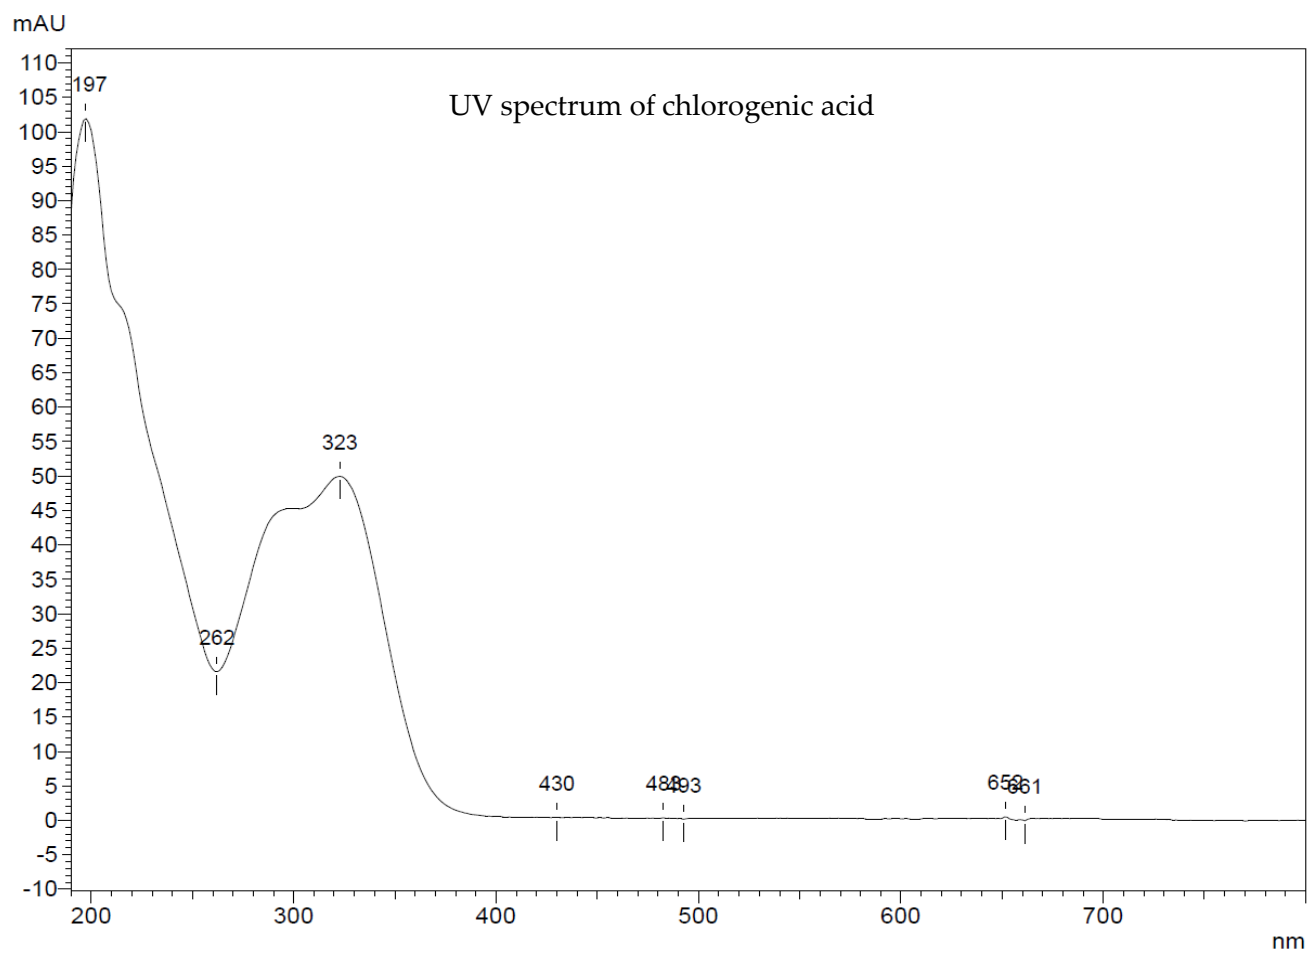

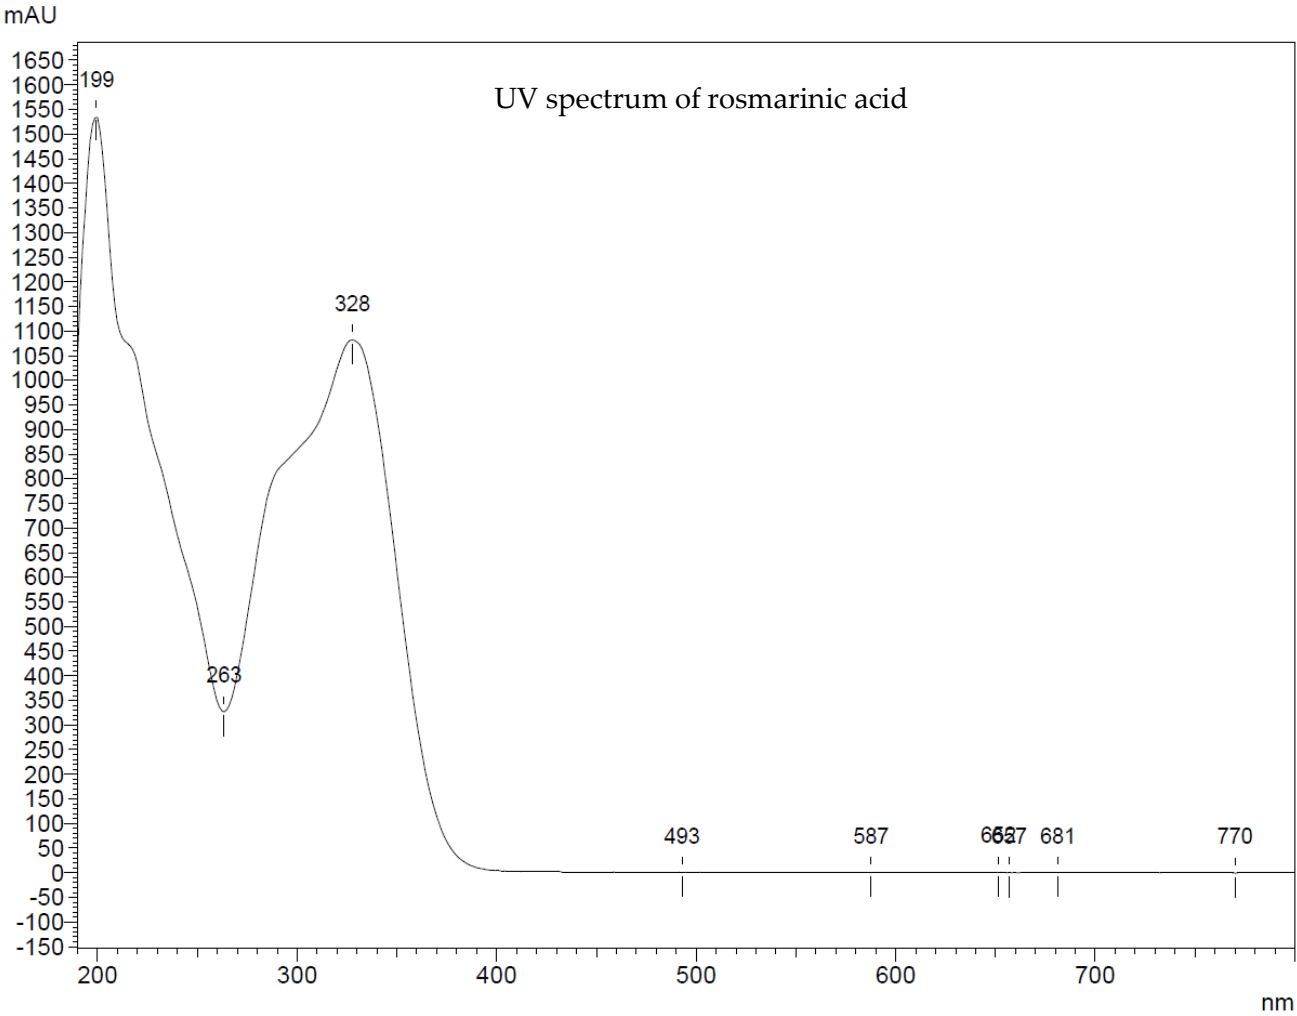

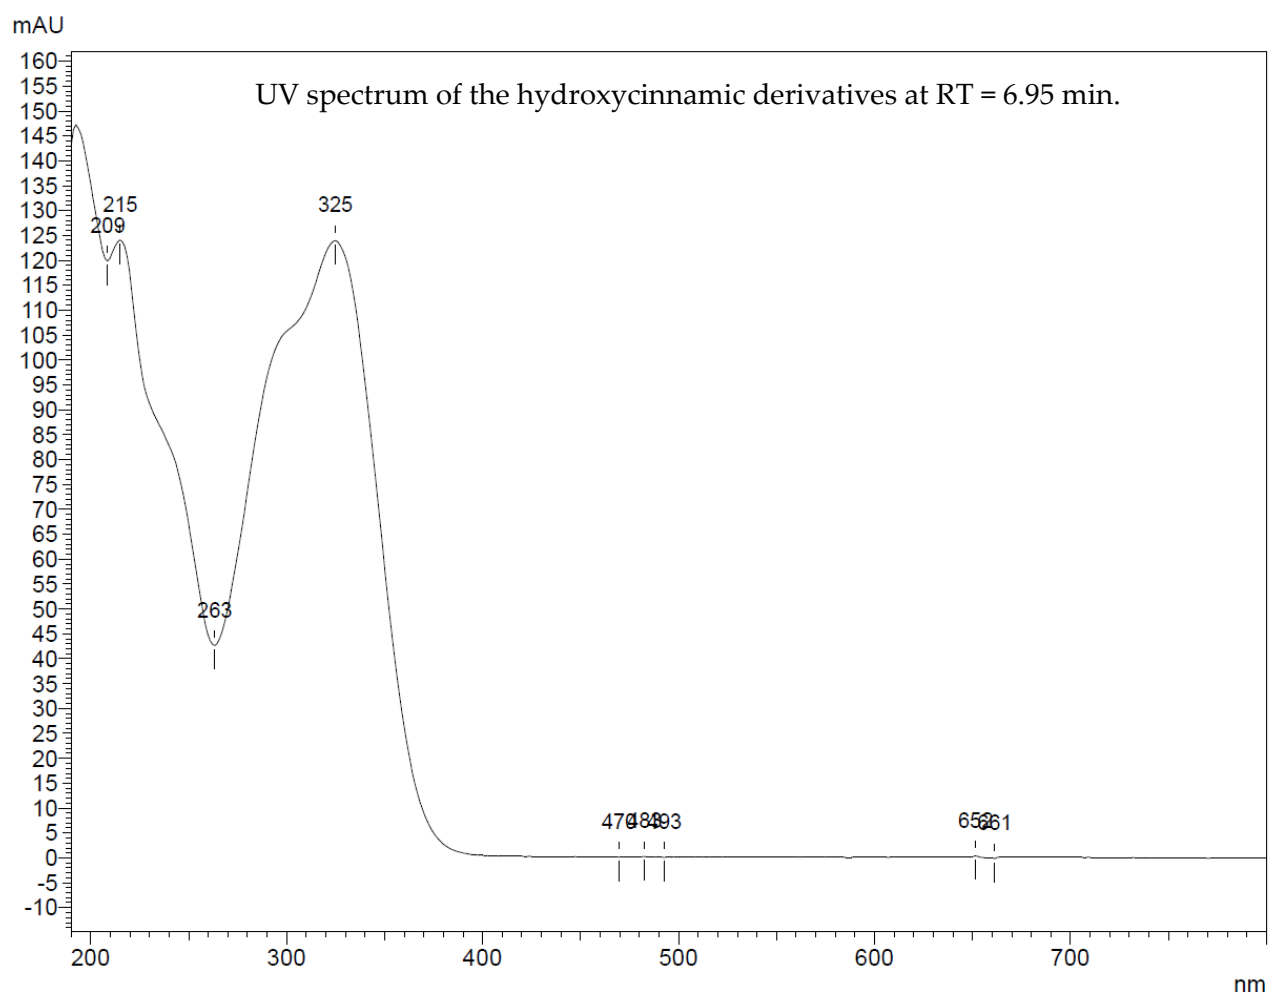

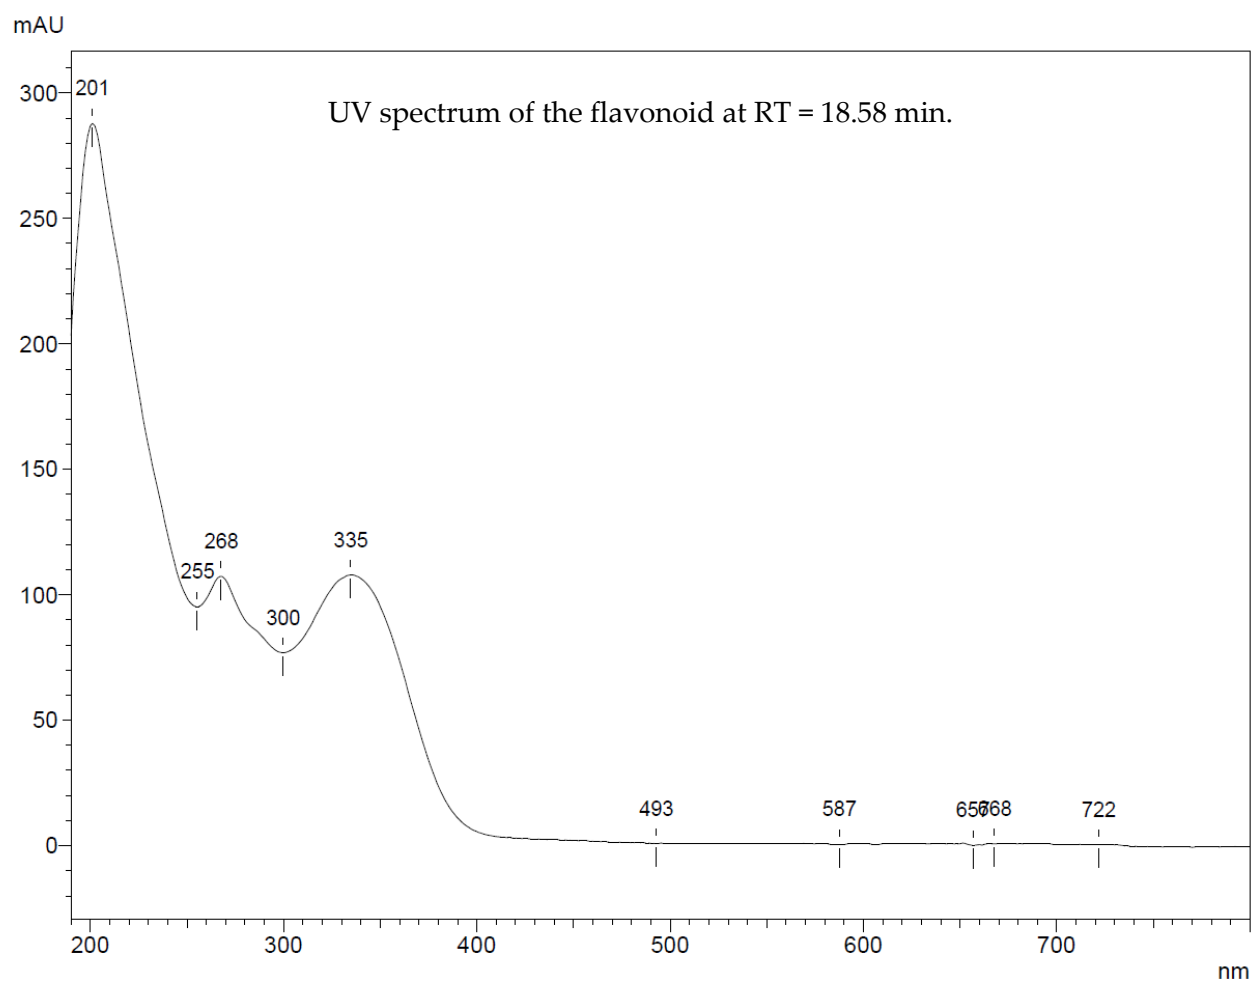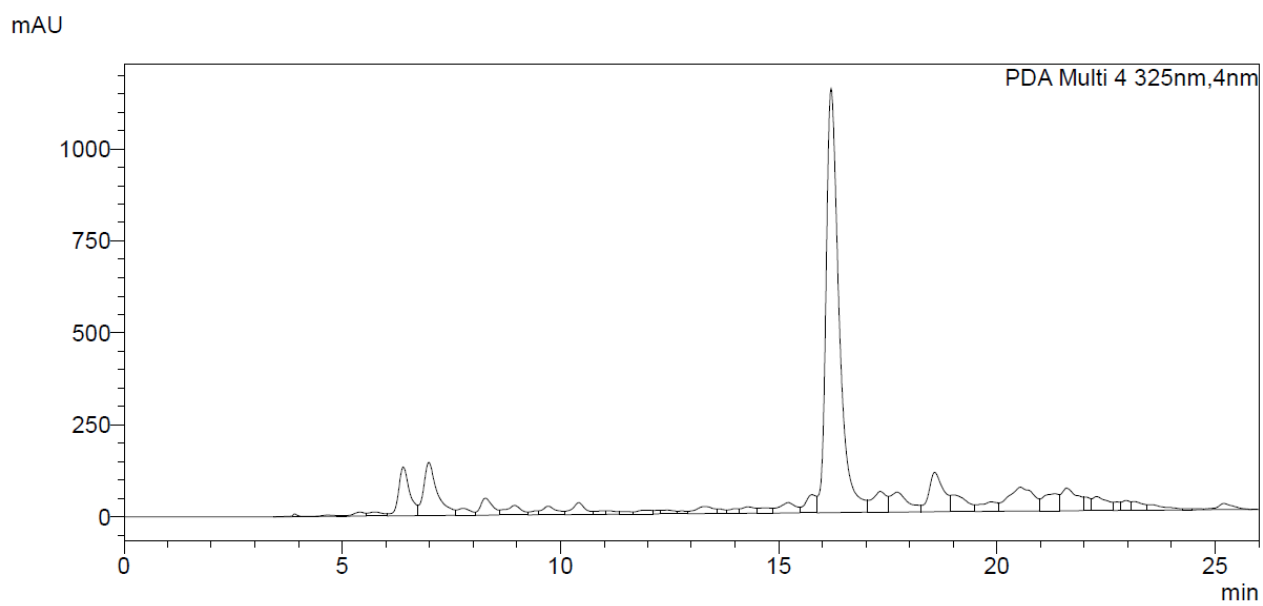

Supplement: s1 [file s1]
